# Supplementary material for: High-performance supported catalysts with an ionic liquid layer for the selective hydrogenation of acetylene
Source: Royal Society of Chemistry journal article supplement (doi:10.1039/c1cc15325k), 2011-01-01
Supplement: c1cc15325k.pdf [file c1cc15325k.pdf]

## Supplementary Information for

### High-performing supported catalysts with an ionic liquid layer for the selective hydrogenation of acetylene

Tanja Herrmann, Laura Rößmann, Martin Lucas and Peter Claus\*

\*Technische Universität Darmstadt, Ernst-Berl-Institut, Technische Chemie II,  
Petersenstraße 20, 64287 Darmstadt, Germany. Fax: +49 6151 16 4788;  
Tel: +49 6151 16 5369; E-Mail: [claus@ct.chemie.tu-darmstadt.de](mailto:claus@ct.chemie.tu-darmstadt.de)

**Table S1** CO chemisorption data for different Pd-Ag shell SCILL

| IL                      | IL loading [ $\text{g}_{\text{IL}}/\text{g}_{\text{catalyst}}$ ] | CO [ $\mu\text{mol}/\text{g}_{\text{catalyst}}$ ] |
|-------------------------|------------------------------------------------------------------|---------------------------------------------------|
| without                 | --                                                               | 0.27                                              |
| BMIM DCA                | 0.01                                                             | 0.27                                              |
|                         | 0.025                                                            | 0.25                                              |
|                         | 0.05                                                             | 0.21                                              |
|                         | 0.1                                                              | 0.21                                              |
| DMIM MeHPO <sub>3</sub> | 0.01                                                             | 0.13                                              |
|                         | 0.025                                                            | 0.09                                              |
|                         | 0.05                                                             | 0.09                                              |

catalysts.

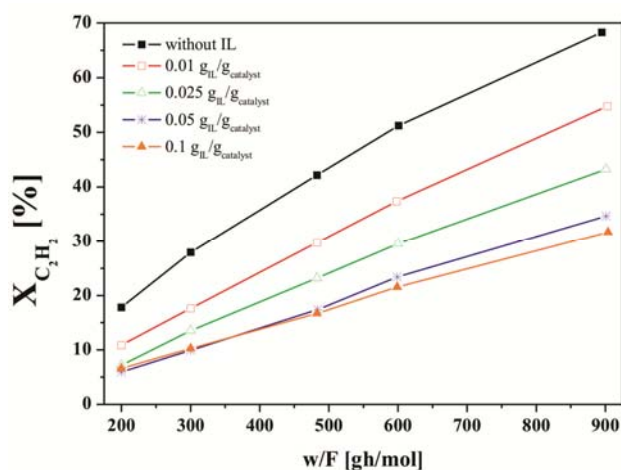

**Fig. S1** Acetylene conversion for Pd-Ag SCILL systems with various [BMIM][DCA] loadings

(conditions: 10 bar,  $\frac{W}{F_{\text{C}_2\text{H}_2}} = 483 \text{ gh mol}^{-1}$ , 1 vol% C<sub>2</sub>H<sub>2</sub>, 1 vol% H<sub>2</sub>, 1 vol% C<sub>3</sub>H<sub>8</sub>, 30 vol% C<sub>2</sub>H<sub>4</sub> in Ar).

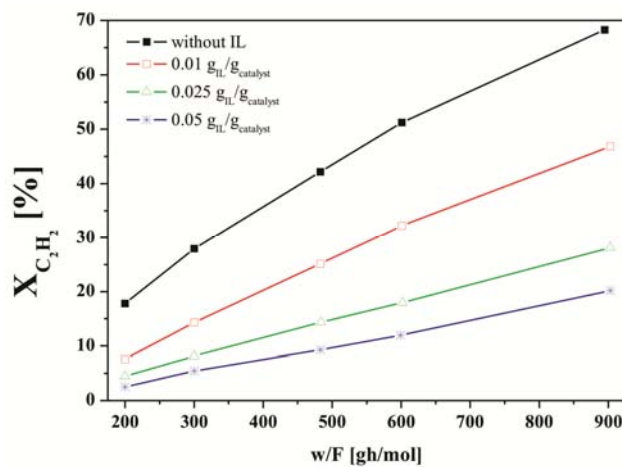

**Fig. S2** Acetylene conversion for Pd-Ag SCILL systems with various [DMIM][MeHPO<sub>3</sub>] loadings

(conditions: 10 bar,  $\frac{W}{F_{\text{C}_2\text{H}_2}} = 483 \text{ gh mol}^{-1}$ , 1 vol% C<sub>2</sub>H<sub>2</sub>, 1 vol% H<sub>2</sub>, 1 vol% C<sub>3</sub>H<sub>8</sub>, 30 vol% C<sub>2</sub>H<sub>4</sub> in Ar).
